# Supplementary material
Source: PubMed Central journal article supplement (PMC3196239)
Supplement: supp_D018184_jlr.D018184-1.pdf [file supp_D018184_jlr.D018184-1.pdf]

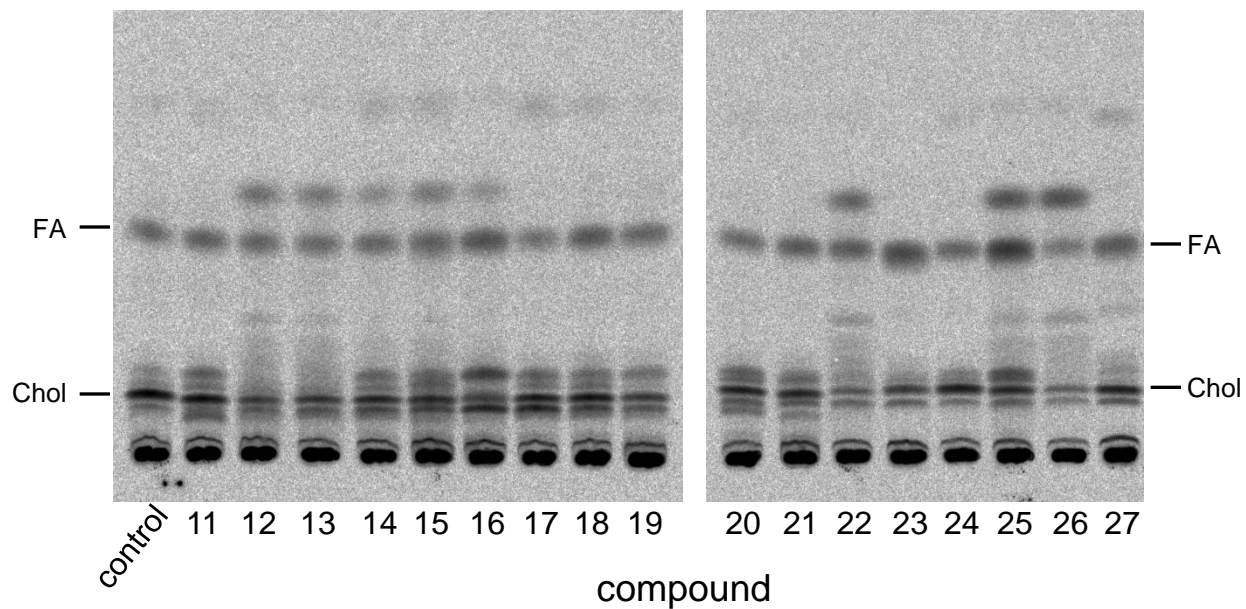

Effects of the hit compounds on *de novo* cholesterol biosynthesis. HeLa cells were cultured in the medium with LPDS for 18 h. Cells were then labeled with [ $^{14}\text{C}$ ]acetic acid for 2 h in the presence of 12.5  $\mu\text{g}/\text{ml}$  compounds. Lipids were extracted and separated on HPTLC.
